# Supplementary material for: Particle Filtration Efficiency Testing of Sterilization Wrap Masks
Source: PubMed Central journal article supplement — J Prev Med Public Health. 2020 Dec 22;54(1):31–6. doi: 10.3961/jpmph.20.394 (PMC7939758; doi:10.3961/jpmph.20.394), 2020-12-22
Supplement: jpmph-20-394-suppl.pdf [file jpmph-20-394-suppl.pdf]

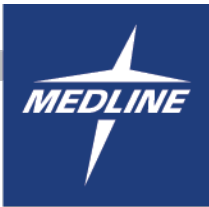

Medline Industries, Inc.

One Medline Place  
Mundelein, IL 60060

1.847.949.5500  
1.800.MEDLINE (633.5463)

[medline.com](http://medline.com)

March 19, 2020

To whom it may concern:

The sterilization wrap item series materials for the following item families GEM1 (47gsm), GEM2 (54gsm), GEM3 (61 gsm), GEM4 (71 gsm), GEM5 (75 gsm), were tested for Bacterial Filtration Efficiency and Differential Pressure (delta P) at Nelson laboratories per Standard Test Protocol Number: STP0004 Rev 12. The test method references the following standard Test Methods: ASTM F2102-14:2014 *Test Method for Evaluating the Bacterial Filtration Efficacy (BFE) of Medical Face Mask Materials, Using a Biological Aerosol of Staphylococcus aureus* and BS EN 14683: 2014 *Surgical Masks – Requirements and Test Methods*.

The following test conditions and results were reported for the Medline sterilization wrap material testing (reference Nelson Laboratories Study #: 865418-S01):

Test Conditions:

Test Side: Either Side

BFE Area Tested: ~40 cm<sup>2</sup>

BFE Flow Rate: 28.3 Liters per minute (L/min)

Delta P Flow Rate: 8 L/min

Conditioning Parameters: 85 ± 5% relative humidity (RH) and 21 ± 5°C for a minimum of 4 hours

Positive Control Average: 1.9 x 10<sup>3</sup> CFU

Negative Monitor Count: <1 CFU

Mean Particle Size (MPS): 3.0 µm

Results:

| Item Number | Average Percent BFE (%) | Average Delta P (mm H <sub>2</sub> O/cm <sup>3</sup> ) |
|-------------|-------------------------|--------------------------------------------------------|
| GEM1        | 98.6                    | 6.2                                                    |
| GEM2        | 98.6                    | 5.7                                                    |
| GEM3        | 99.2                    | 8.2                                                    |
| GEM4        | 98.8                    | 7.8                                                    |
| GEM5        | 98.4                    | 7.0                                                    |

Sincerely,

Alexandra Savage  
QA Manager – OR Division
